# Supplementary material for: Deep Learning in Pancreatic Tissue: Identification of Anatomical Structures, Pancreatic Intraepithelial Neoplasia, and Ductal Adenocarcinoma
Source: MDPI journal article supplement (doi:10.3390/ijms22105385), 2021-05-20
Supplement: s1 [file s1]

**Suppl. Figure 1.: Validation and test non-aggregated confusion matrices for all classes for the B2 EfficientNet model and various quality control (QC) limits.**

**Test set**

**QC 0.5:**

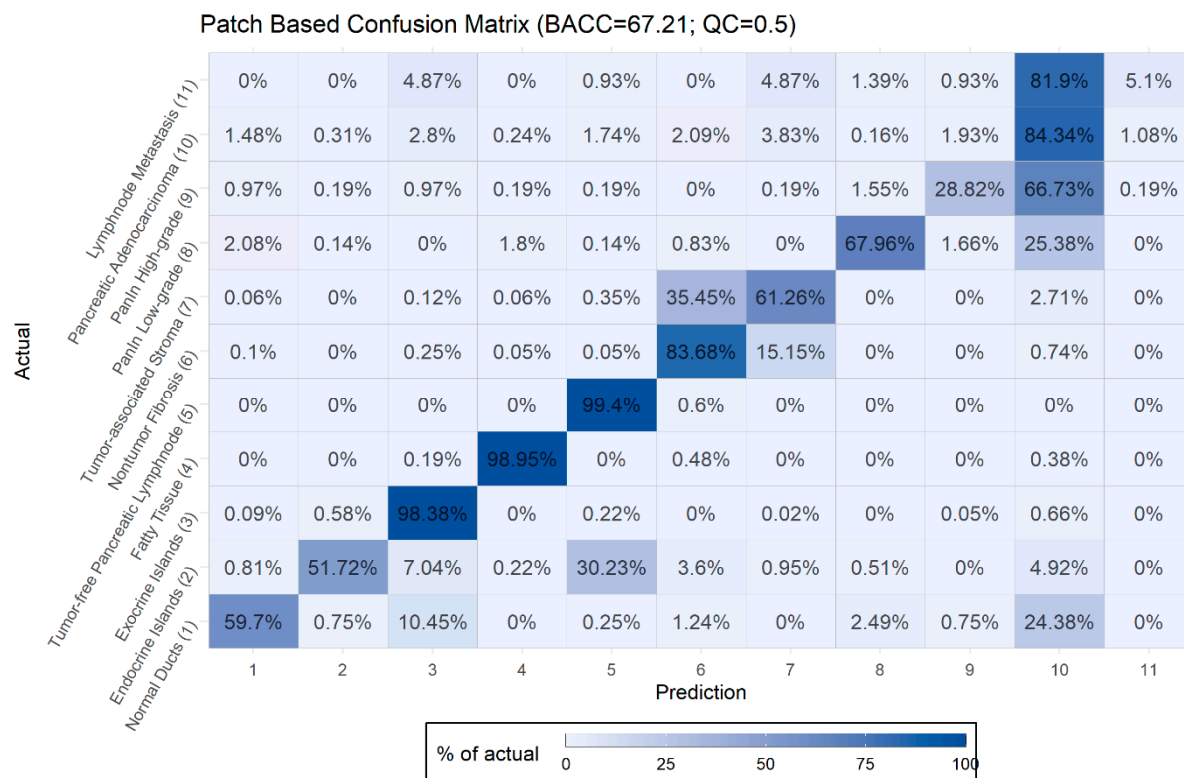

**QC 0.6**

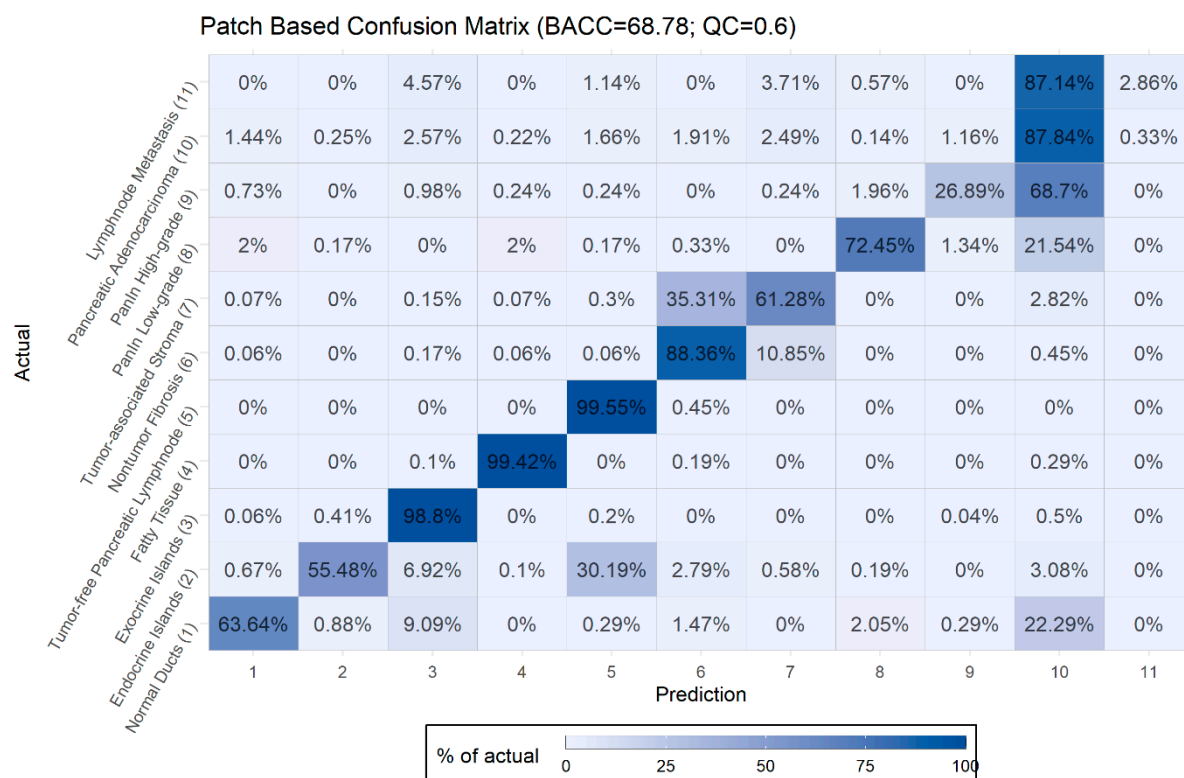

QC 0.7

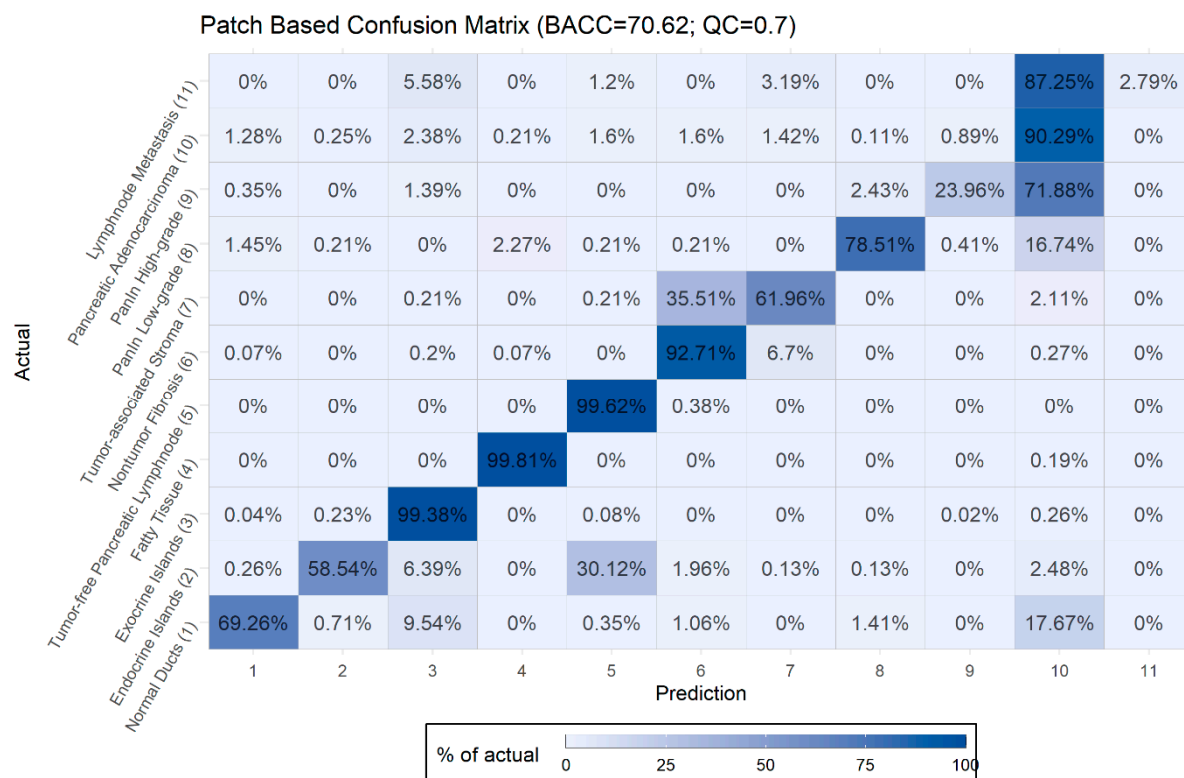

QC 0.8

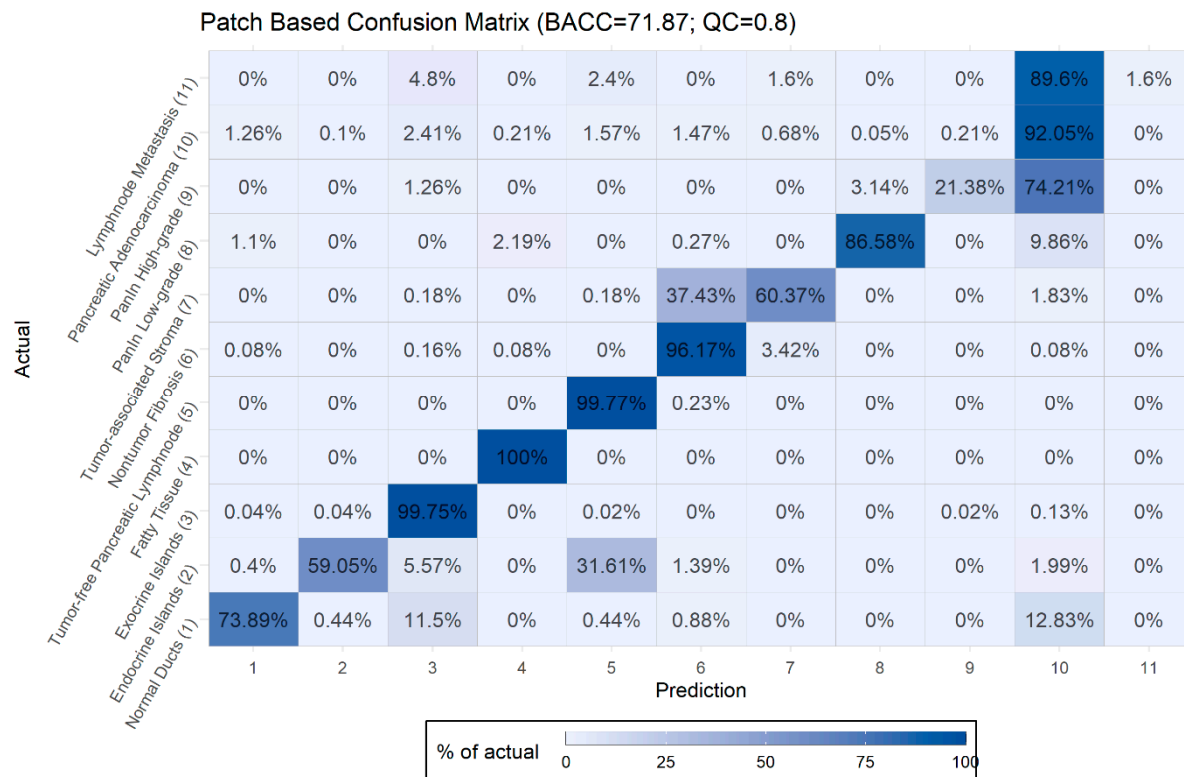

QC 0.9

Patch Based Confusion Matrix (BACC=73.2; QC=0.9)

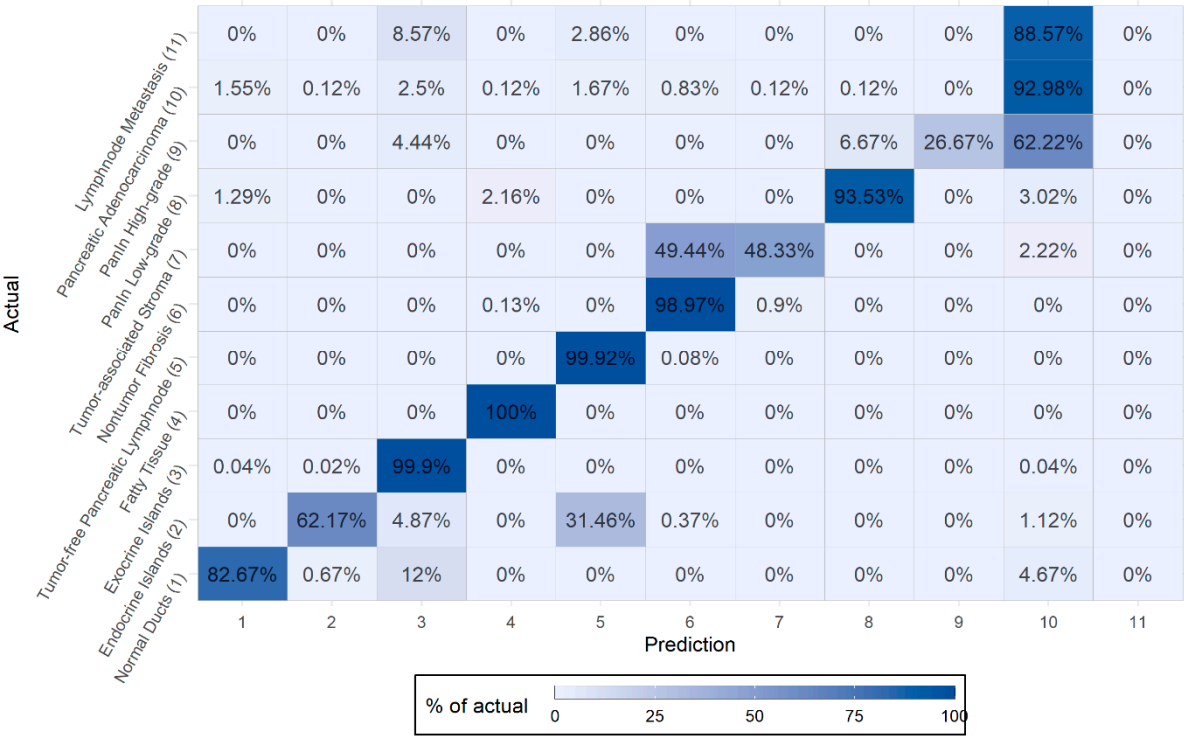

## Validation set

QC 0.5

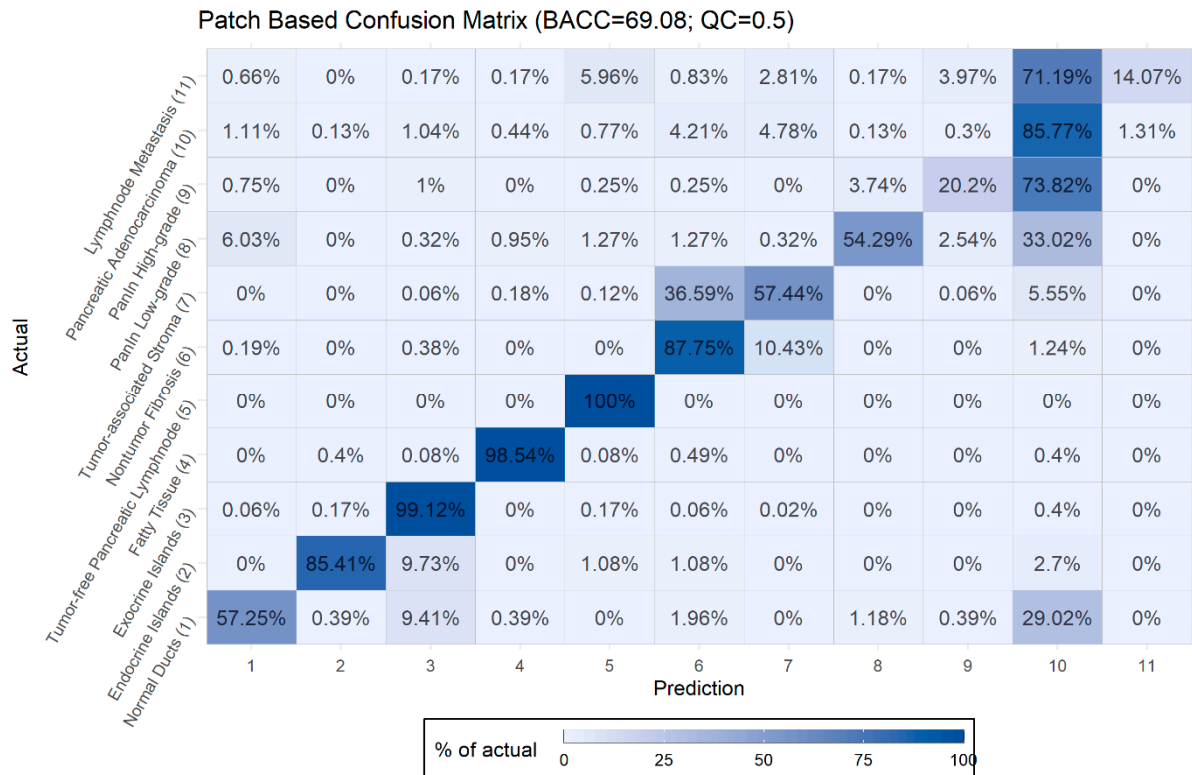

QC 0.6

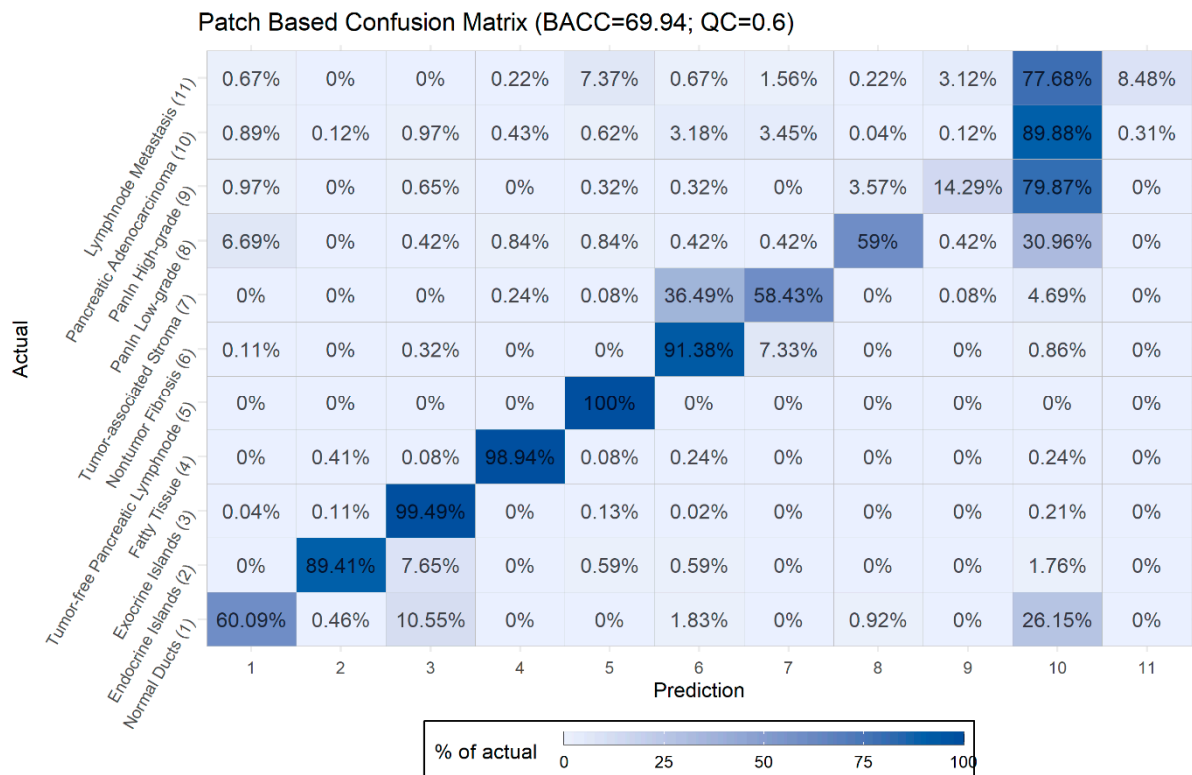

QC 0.7

Patch Based Confusion Matrix (BACC=71.29; QC=0.7)

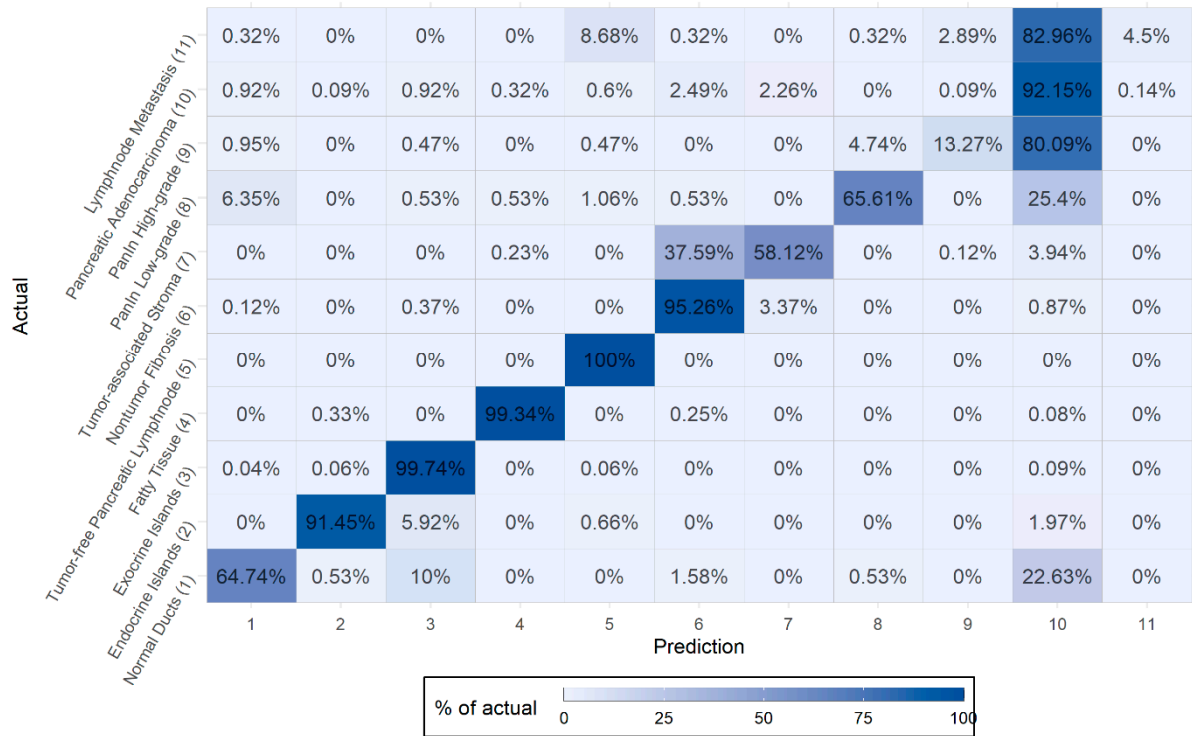

QC 0.8

Patch Based Confusion Matrix (BACC=72.55; QC=0.8)

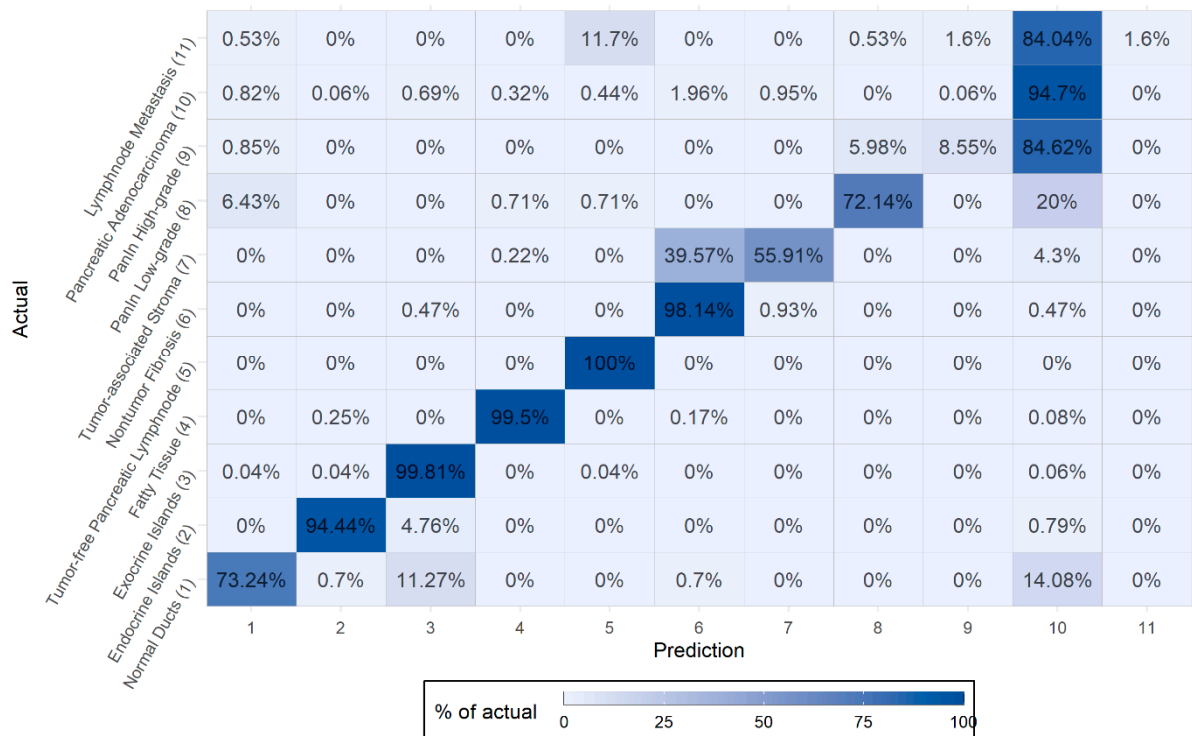

QC 0.9

Patch Based Confusion Matrix (BACC=72.92; QC=0.9)

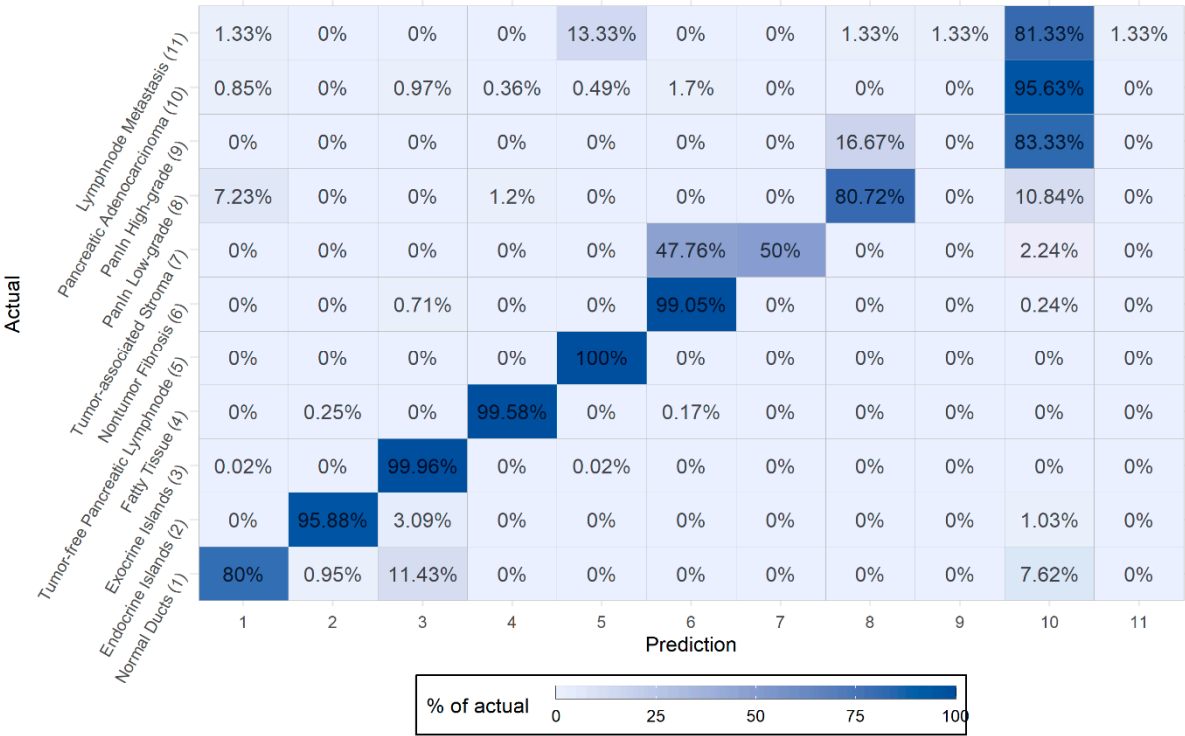

Suppl. Table 1

|    | Class                                 | Slide_<br>1_n | Slide_<br>1_perc | Slide_<br>2_n | Slide_<br>2_perc | Slide_<br>3_n | Slide_<br>3_perc | Slide_<br>4_n | Slide_<br>4_perc |
|----|---------------------------------------|---------------|------------------|---------------|------------------|---------------|------------------|---------------|------------------|
| 1  | Fatty Tissue                          | 437           | 1,28             | 1097          | 2,04             | 1140          | 2,35             | 393           | 1,1              |
| 2  | Tumor-free<br>Pancreatic<br>Lymphnode | 315           | 0,92             | 2092          | 3,89             | 927           | 1,91             | 5642          | 15,8             |
| 3  | Exocrine Islands                      | 7965          | 23,34            | 2395          | 4,46             | 19            | 0,04             | 524           | 1,47             |
| 4  | Endocrine<br>Islands                  | 96            | 0,28             | 348           | 0,65             | 171           | 0,35             | 104           | 0,29             |
| 5  | Nontumor<br>Fibrosis                  | 1362          | 3,99             | 9662          | 17,99            | 6010          | 12,37            | 4404          | 12,33            |
| 6  | Tumor-<br>associated<br>Stroma        | 166           | 0,49             | 2227          | 4,15             | 7488          | 15,41            | 2171          | 6,08             |
| 7  | Normal Ducts                          | 101           | 0,3              | 182           | 0,34             | 19            | 0,04             | 42            | 0,12             |
| 8  | PanIN Low-<br>grade                   | 59            | 0,17             | 242           | 0,45             | 30            | 0,06             | 65            | 0,18             |
| 9  | PanIN High-<br>grade                  | 10            | 0,03             | 18            | 0,03             | 48            | 0,1              | 22            | 0,06             |
| 10 | Pancreatic<br>Adenocarcinoma          | 211           | 0,62             | 1495          | 2,78             | 2341          | 4,82             | 1929          | 5,4              |
| 11 | Lymph node<br>Metastasis              | 0             | 0                | 1             | 0                | 11            | 0,02             | 4             | 0,01             |
| 12 | Empty                                 | 22200         | 65,05            | 31946         | 59,48            | 28676         | 59,01            | 17586         | 49,24            |
| 13 | Multiple<br>predictions               | 0             | 0                | 9             | 0,02             | 1             | 0                | 1             | 0                |
| 14 | QC Failed                             | 1206          | 3,53             | 1996          | 3,72             | 1713          | 3,53             | 2830          | 7,92             |
